# Supplementary material
Source: PubMed Central journal article supplement (PMC7135956)

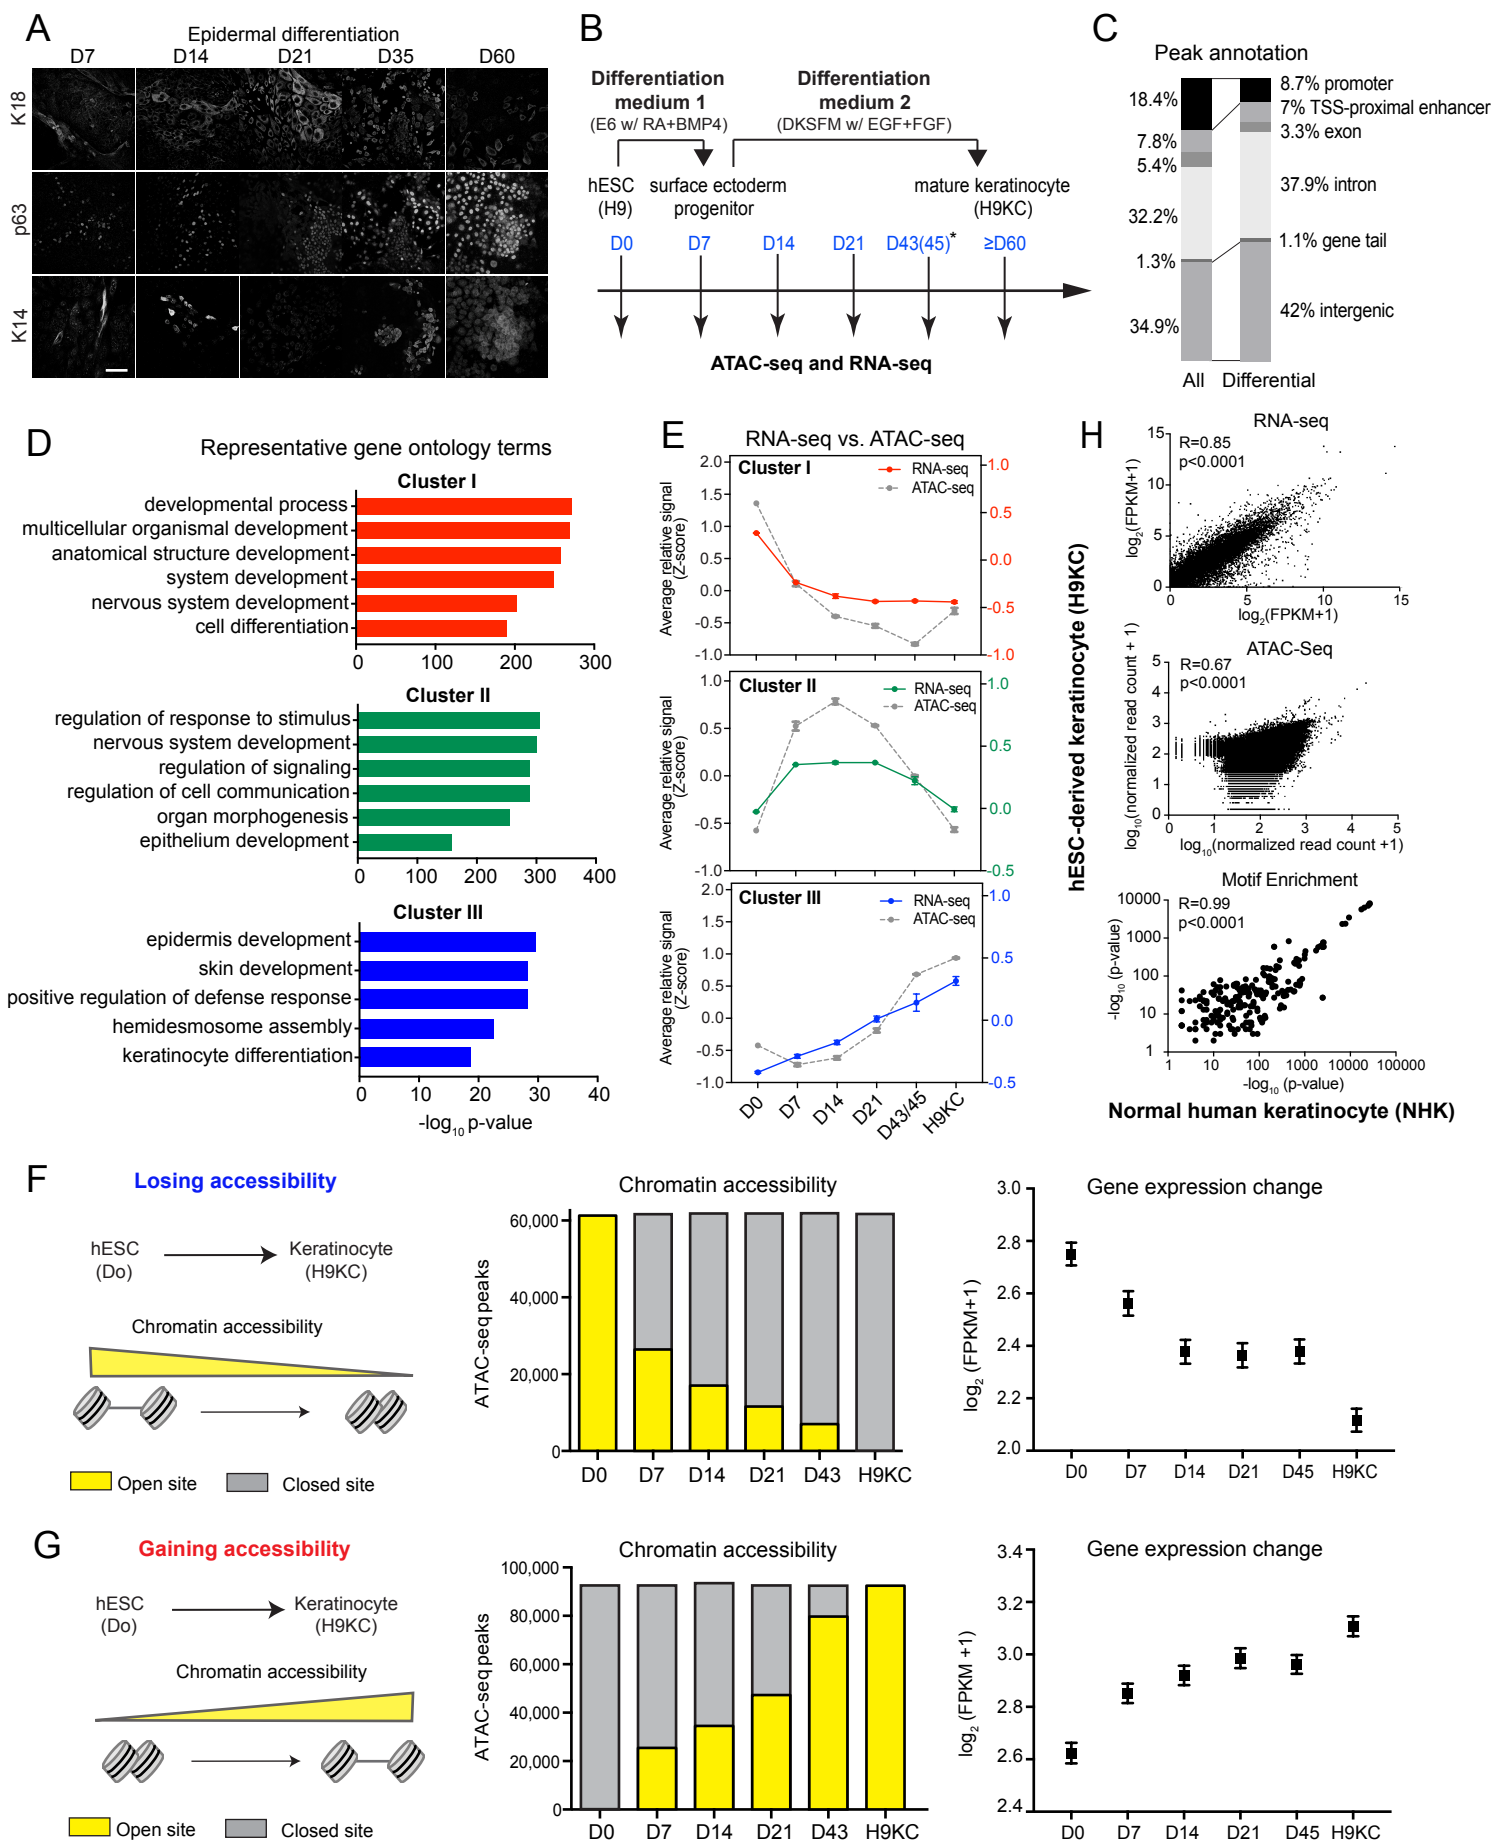

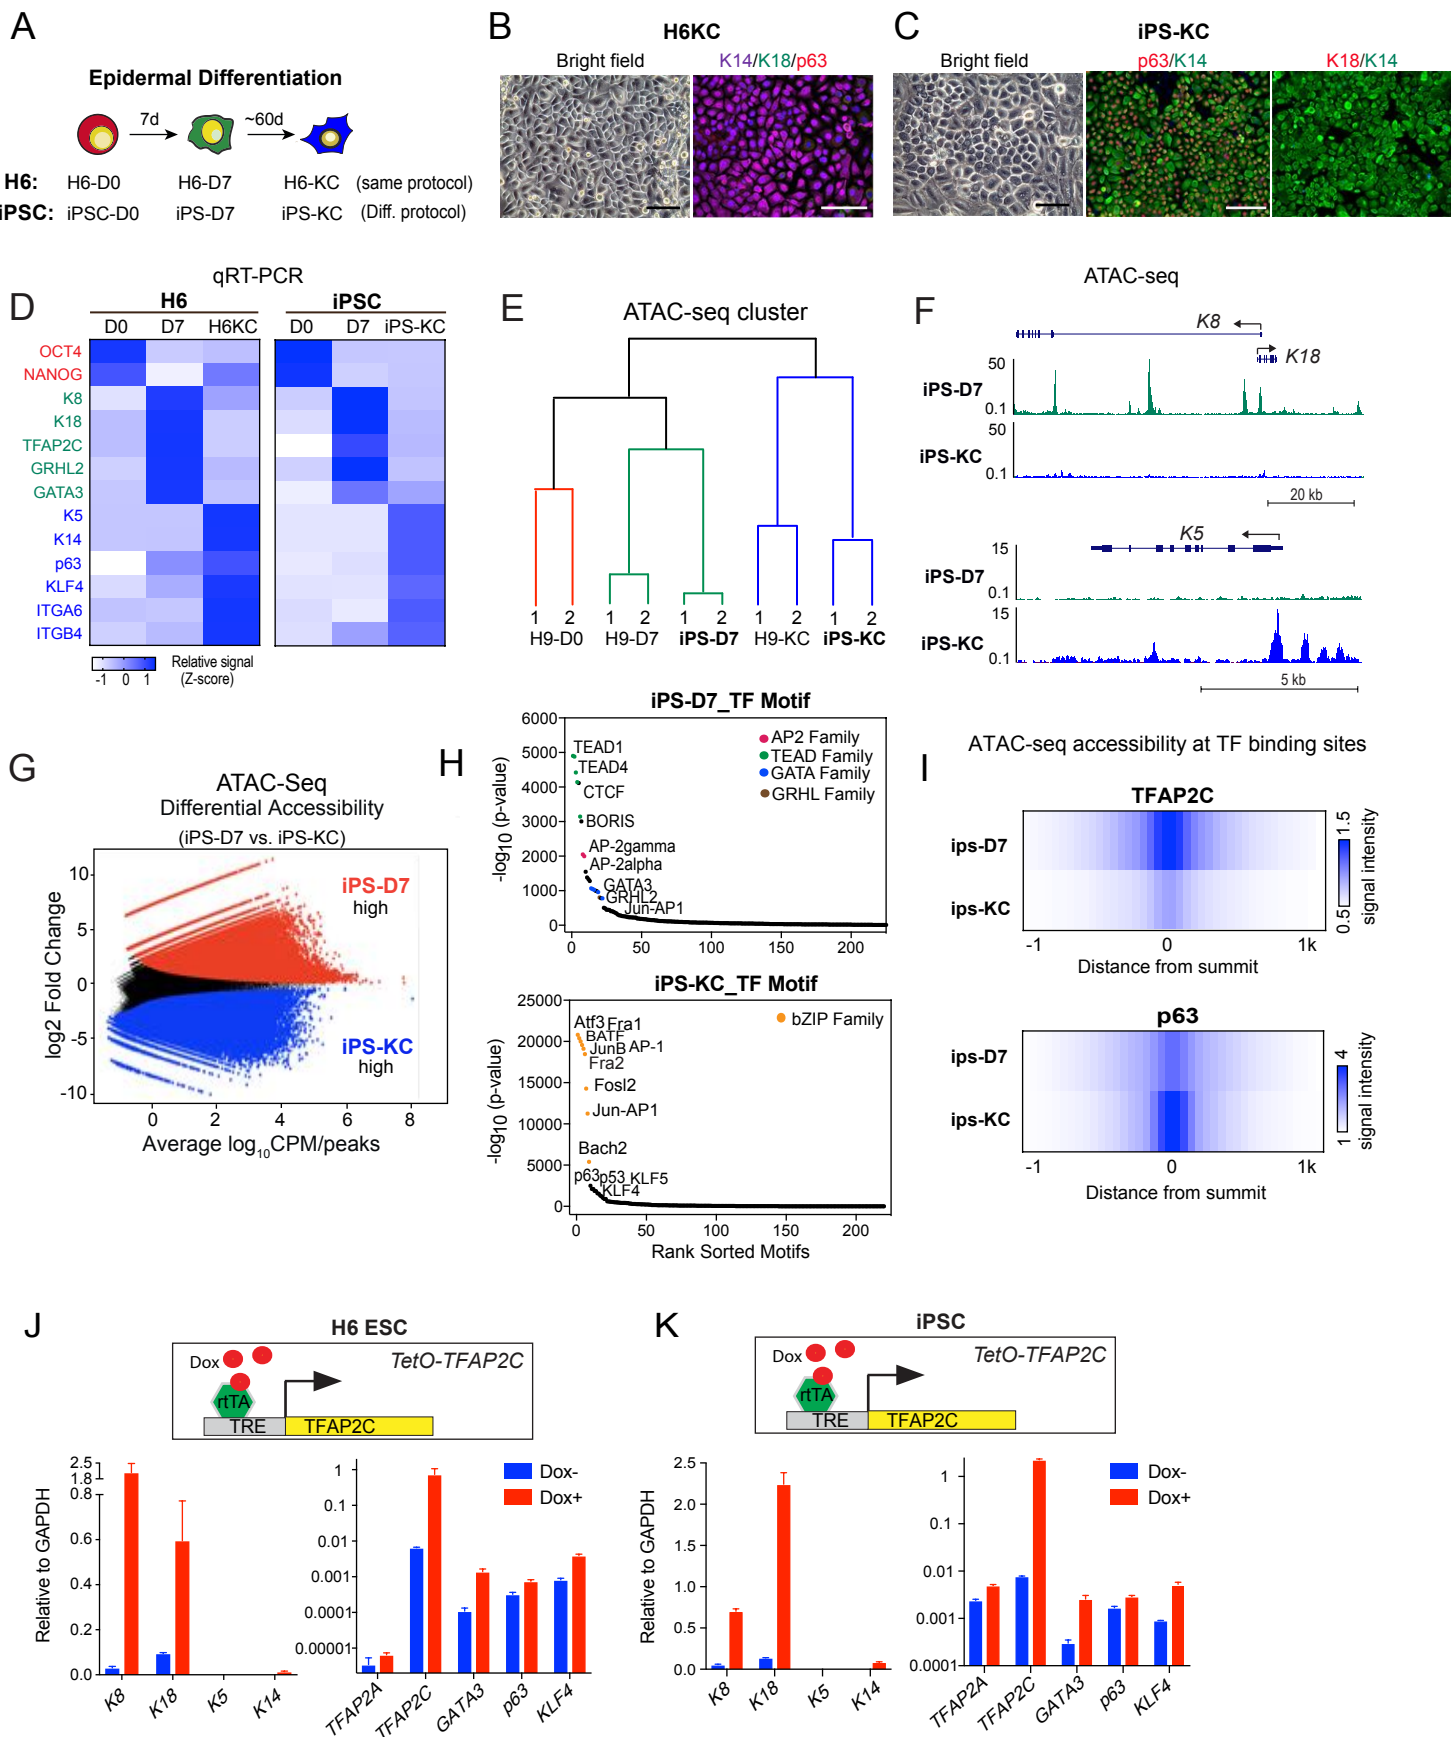

**A** TF-Accessible Regulatory Element-TG based network reconstruction pipeline

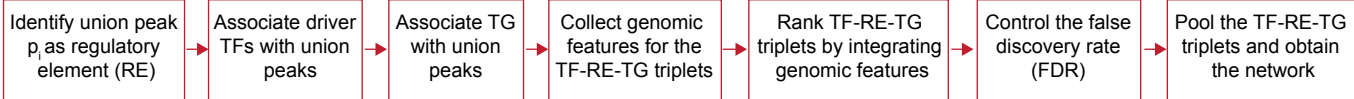

|                                         | Transcription Factor                                                                                                                                                                                              | Accessible Regulatory Element (time course ATAC-seq union peaks)                     | Target Gene                                                          |
|-----------------------------------------|-------------------------------------------------------------------------------------------------------------------------------------------------------------------------------------------------------------------|--------------------------------------------------------------------------------------|----------------------------------------------------------------------|
| <b>Investigated features</b>            | Expression level ( $X_{TF}$ )**<br>TF motif enrichment ( $E_{TF}$ )***<br>Binding strength ( $B_i$ )*                                                                                                             | Motif sequence conservation ( $C_i$ )*<br>Openness level of peak region ( $O_i$ )*** | Expression level ( $X_{TG}$ )**<br>Promoter openness ( $O_{TG}$ )*** |
| <b>Public chromatin connection data</b> | Chromatin contacts in keratinocyte, Hi-C in NHEK (Rao et al., Cell 2014)<br>Cross-cell-type correlation of DHS (DNaseI hypersensitive sites) signal at distal enhancer and promoter (Thurman et al., Nature 2012) |                                                                                      |                                                                      |

\* Context non-specific features  
\*\* Context specific features from RNA-seq  
\*\*\* Context specific features from ATACseq

**C** Transcription factors shown in the regulatory network

| Initiation Process                                                                                                                                                     | Maturation Process                                                                                                                                     |
|------------------------------------------------------------------------------------------------------------------------------------------------------------------------|--------------------------------------------------------------------------------------------------------------------------------------------------------|
| <p><b>TF associated with gaining accessibility</b></p> <p><b>TFAP2C TFAP2A GRHL2 GATA3 JUN ATF3 FOS TEAD1</b><br/>TEAD2 TEAD4 ELF1 CEBPB ETS1 ETS2 GABPA OCT4 SOX2</p> | <p><b>TF associated with gaining accessibility</b></p> <p><b>p63 p53 KLF4 KLF5 BATF JUN FOS</b></p>                                                    |
| <p><b>TF associated with losing accessibility</b></p> <p><b>OCT4 NANOG SOX2 JUN ATF3 FOS TEAD1 TEAD4</b></p>                                                           | <p><b>TF associated with losing accessibility</b></p> <p><b>TFAP2C GATA3 TEAD1 TEAD2 TEAD4 JUND</b><br/>EWSR1 PBX1 TCF3 GABPA RFX3 HOXB4 NF1 NR4A1</p> |

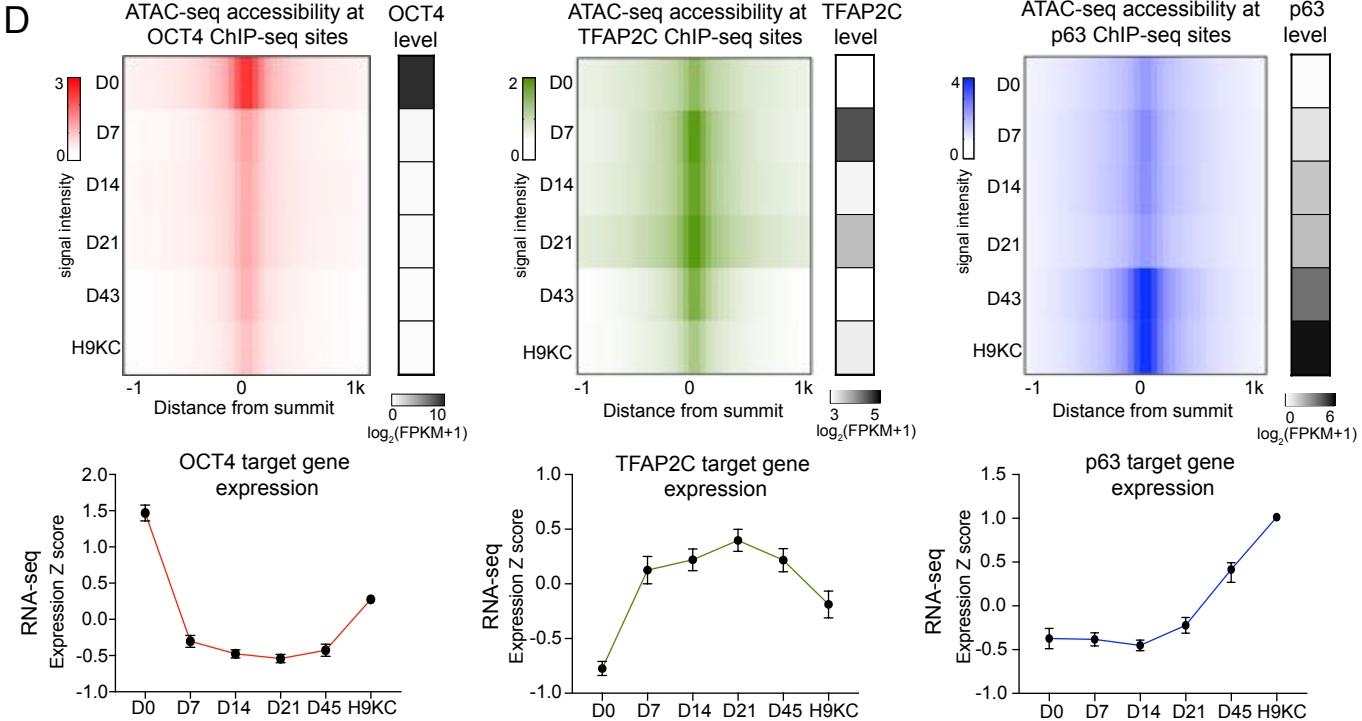

Figure S4

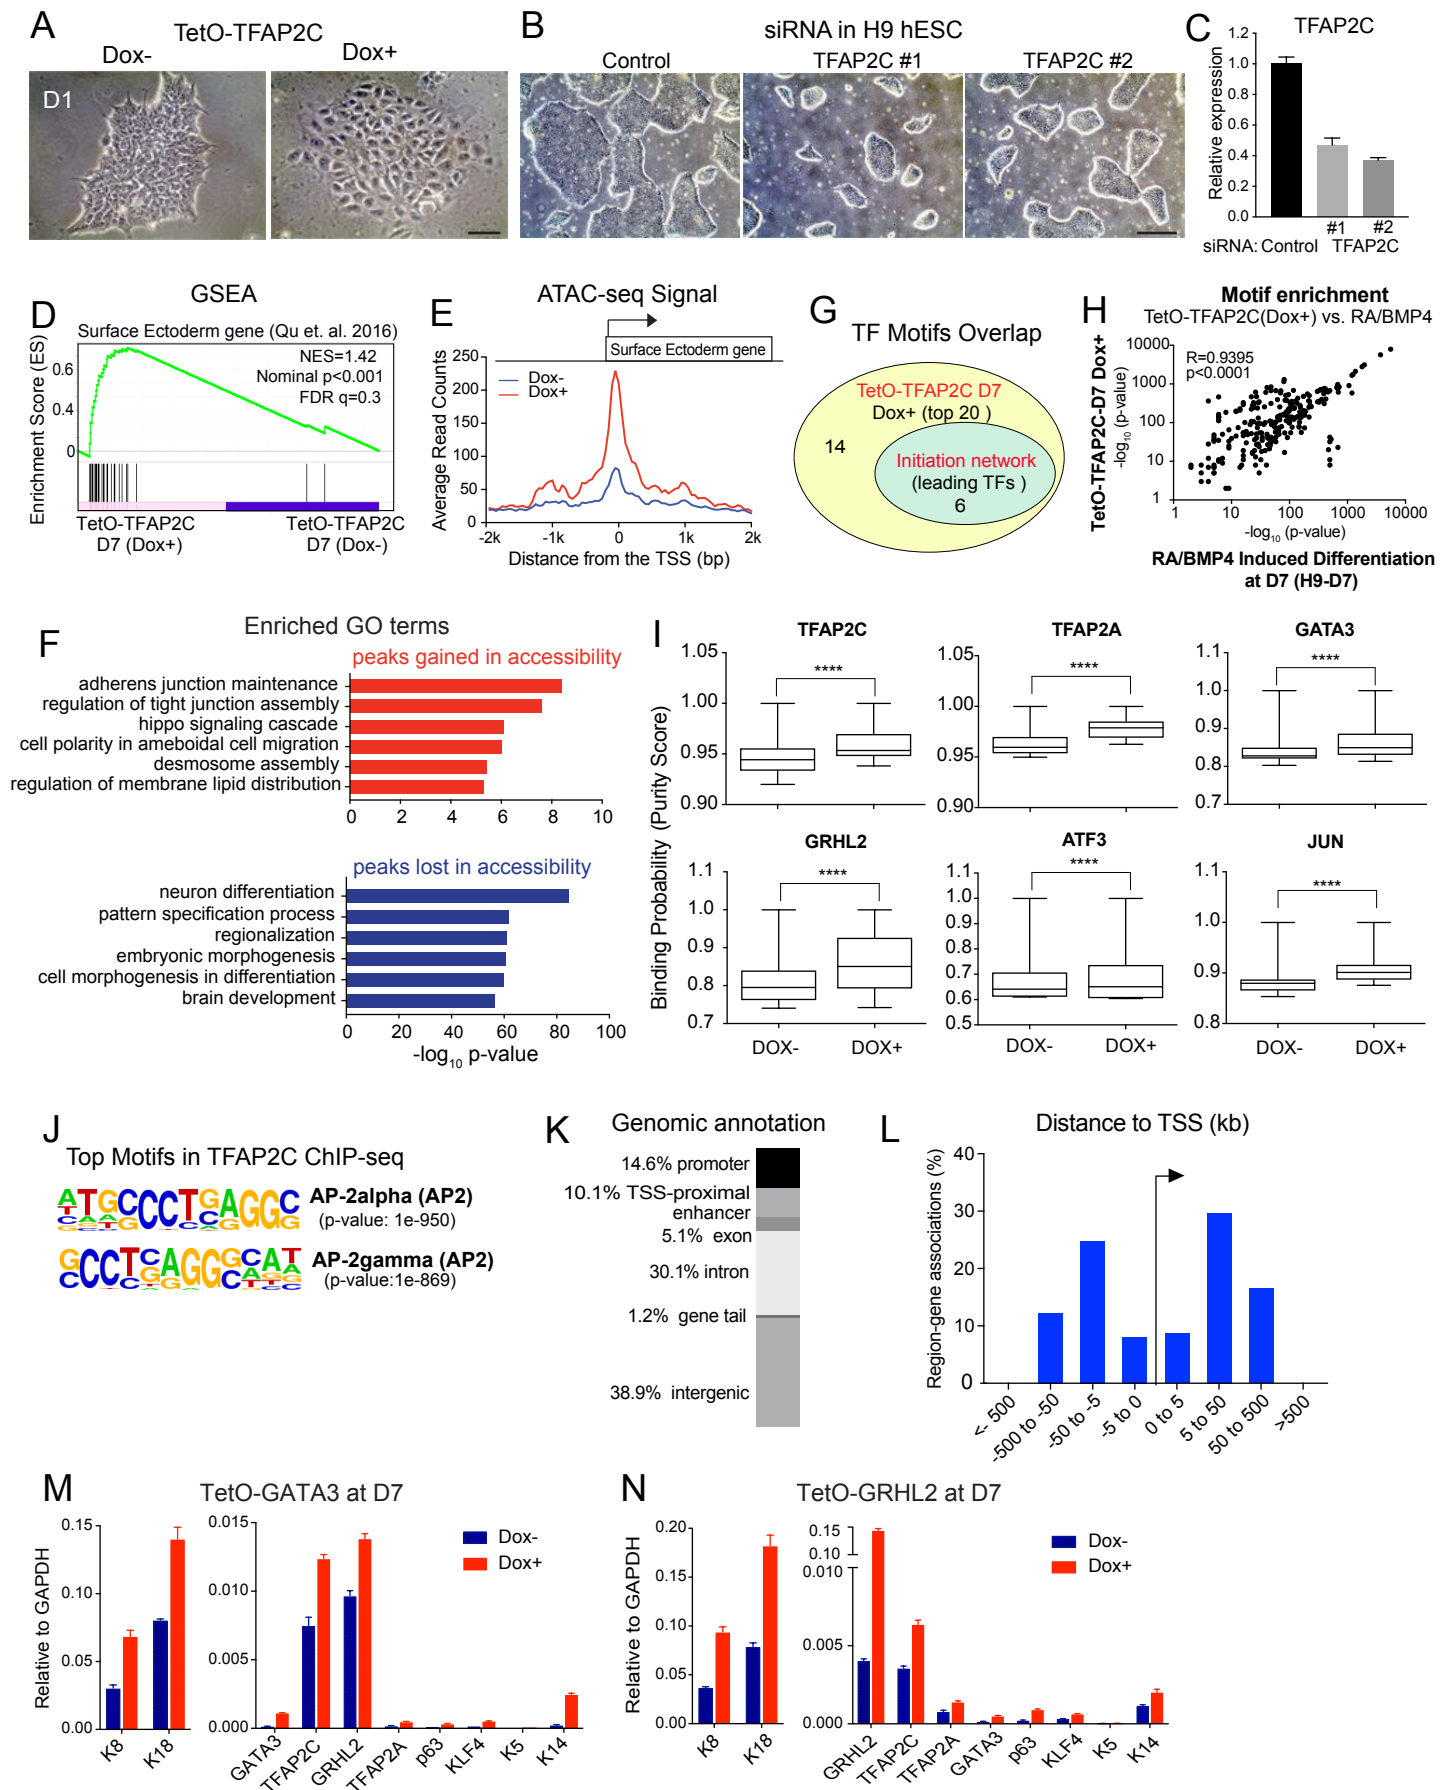

Figure S5

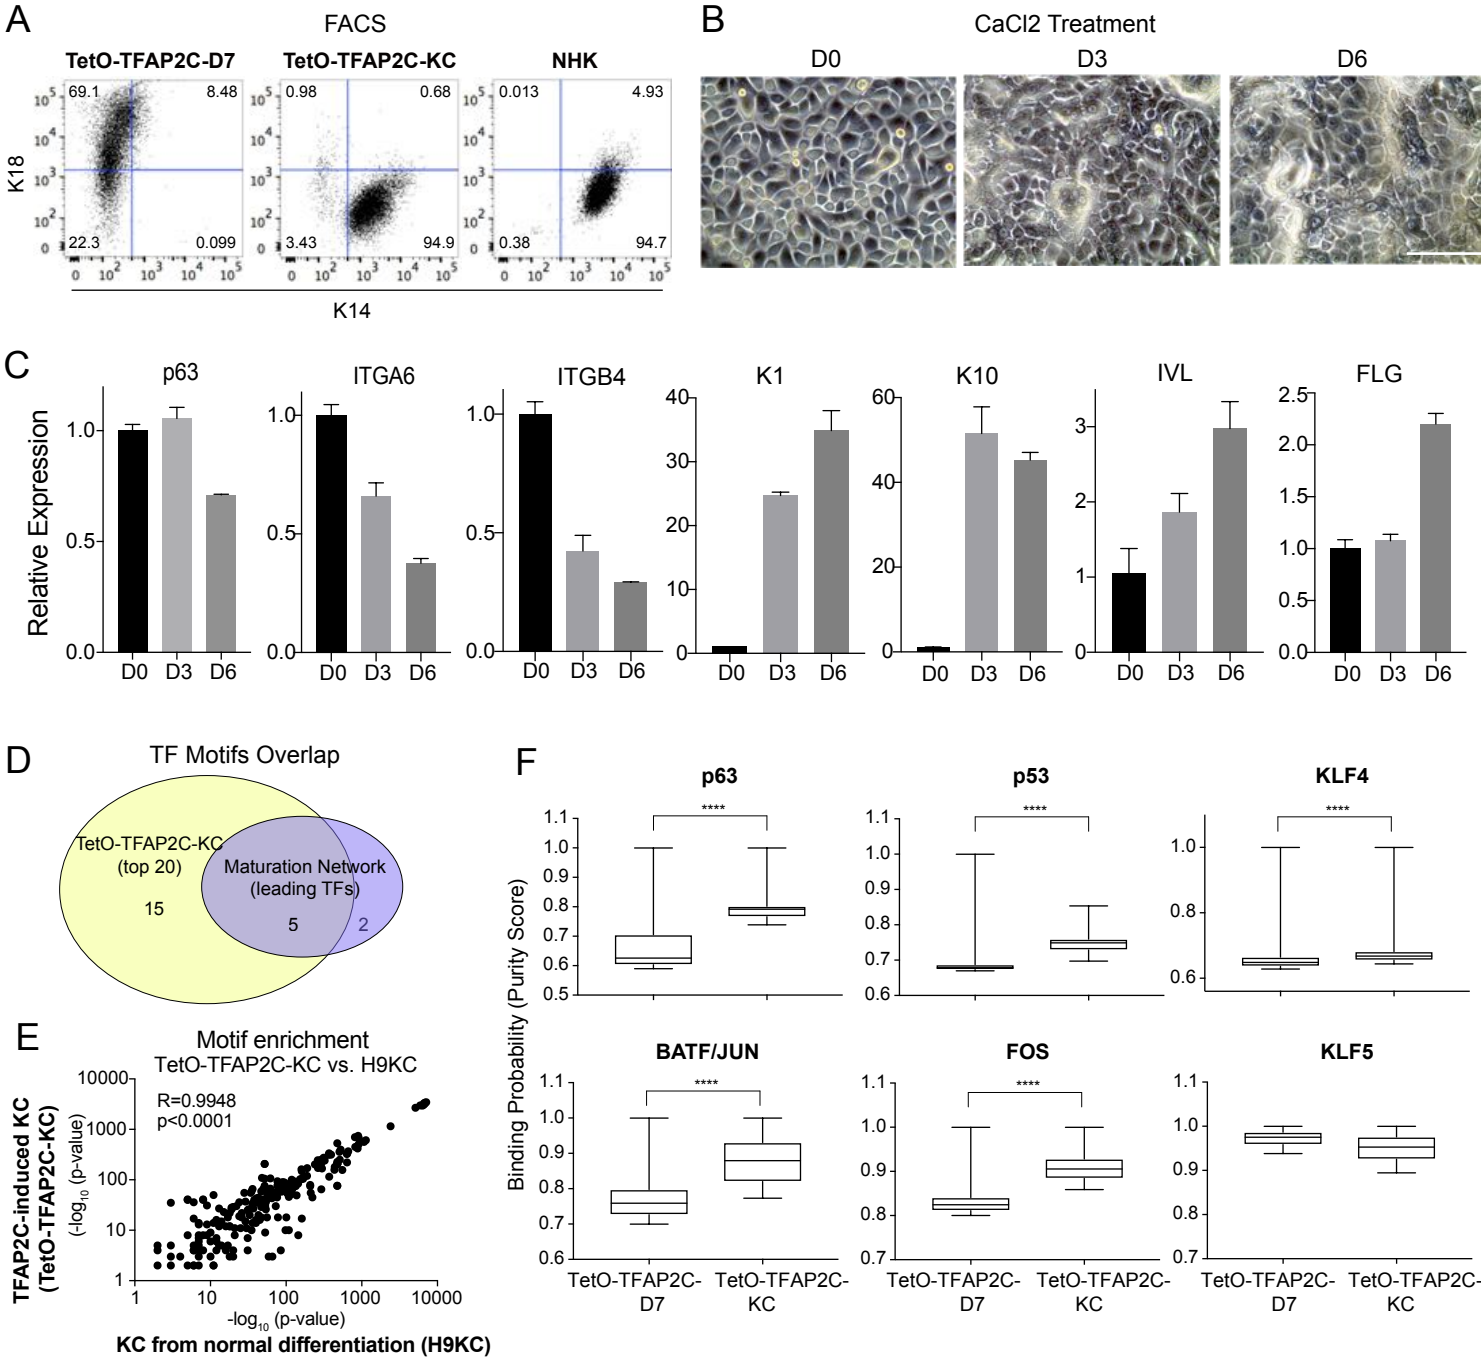

Figure S6

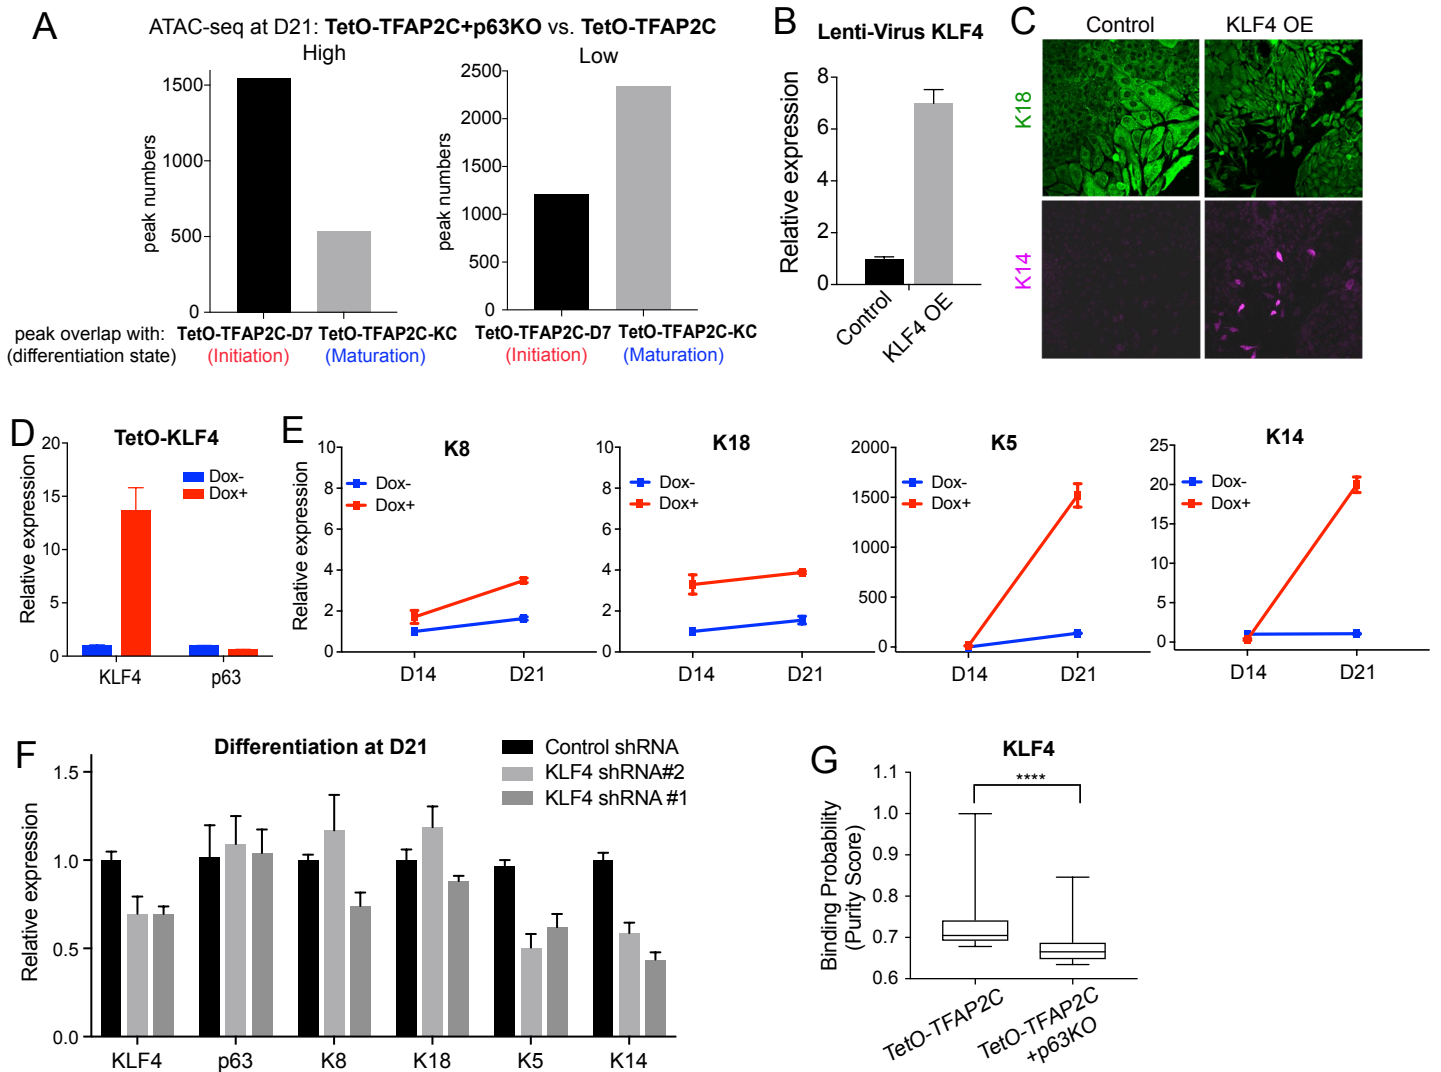

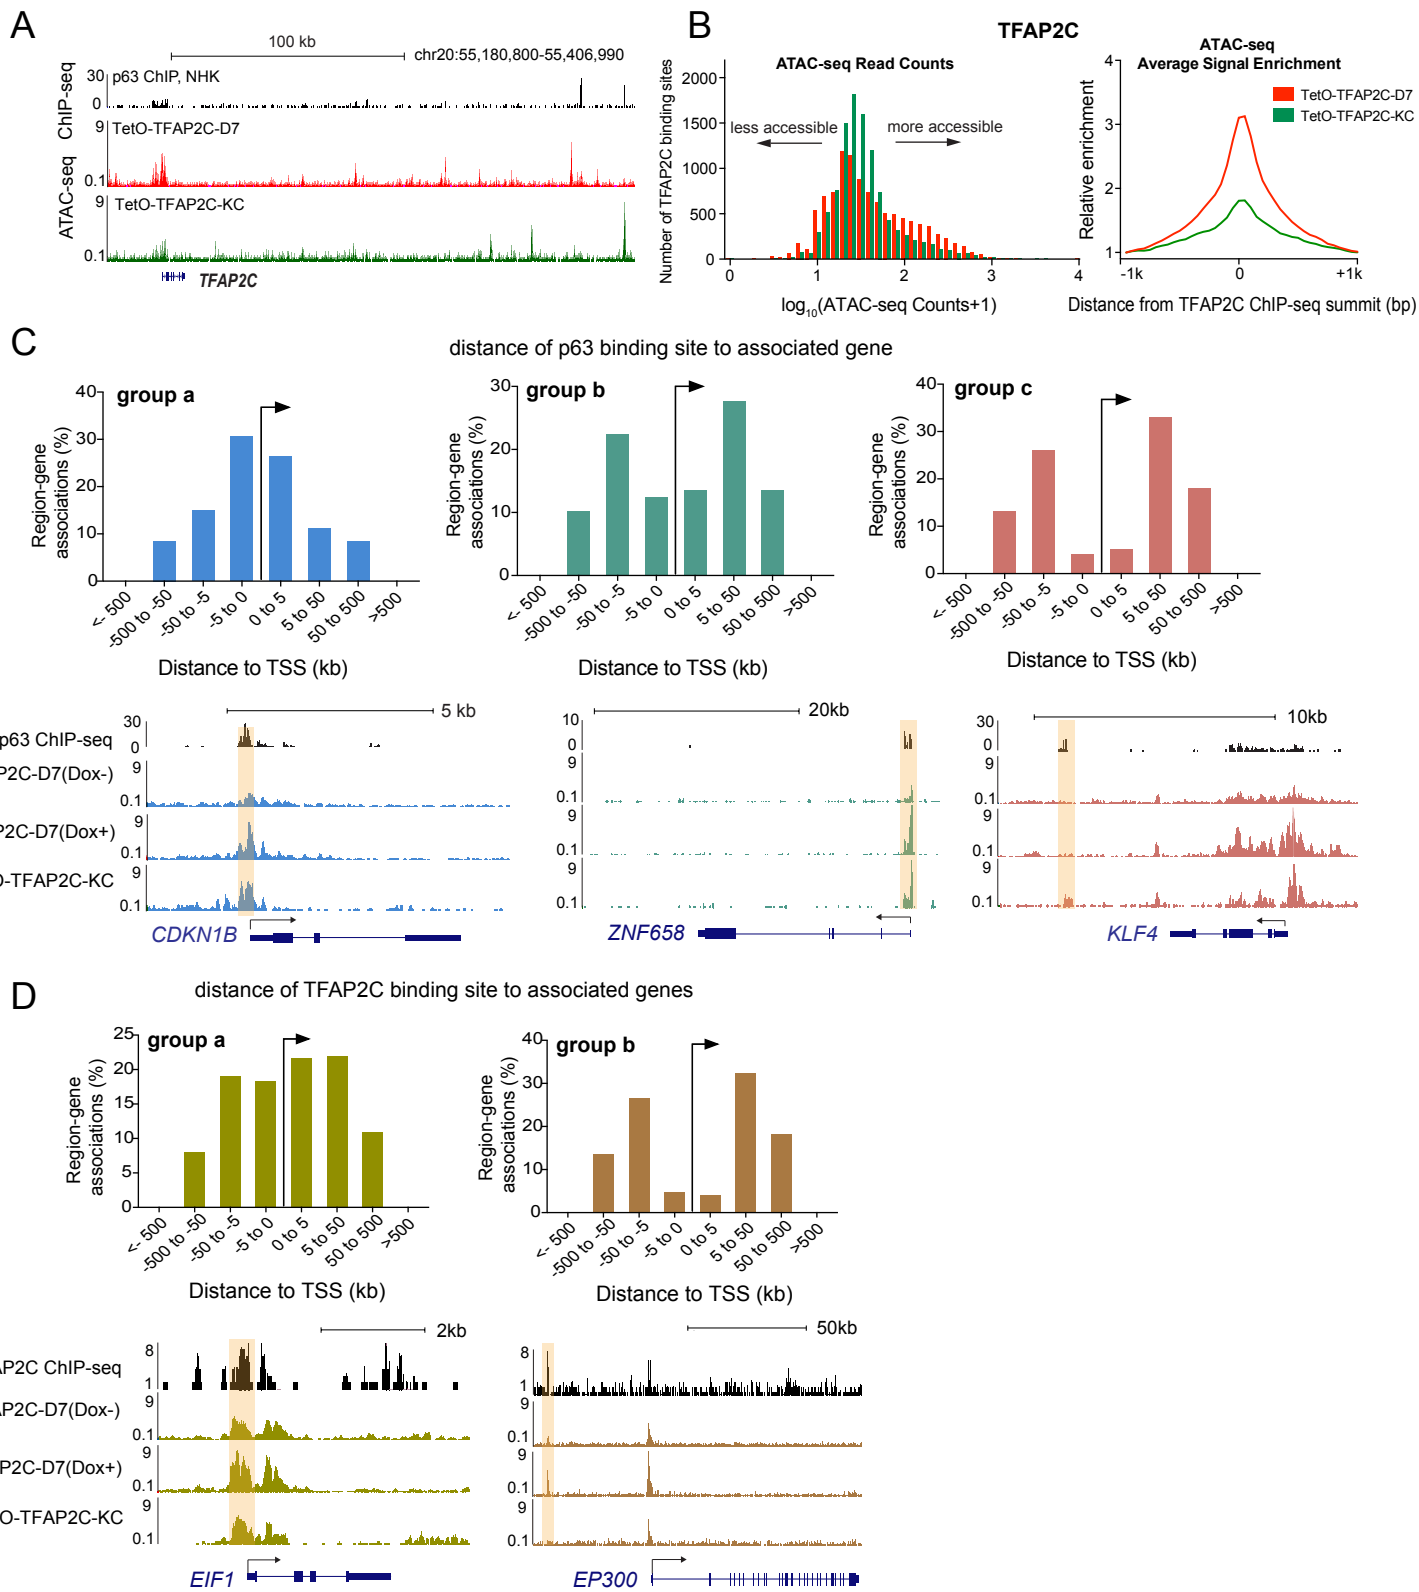

Supplement: NIHMS1035203-supplement-supplementary_figures_Li_et_al__CSC_2019.pdf [file NIHMS1035203-supplement-supplementary_figures_Li_et_al__CSC_2019.pdf]
